1 **Mindfulness supports emotional resilience in children during the COVID-19 Pandemic**

2 **Isaac N. Treves<sup>1,2</sup>, Cindy E. Li<sup>2</sup>, Kimberly L. Wang<sup>1</sup>, Ola Ozernov-Palchik<sup>1</sup>, Halie A.**

3 **Olson<sup>1</sup>, and John D.E. Gabrieli<sup>1</sup>**

4 <sup>1</sup>Department of Brain and Cognitive Sciences and McGovern Institute for Brain Research,

5 Massachusetts Institute of Technology, 43 Vassar Street, Cambridge, MA 02139, USA

6 <sup>2</sup>Hock E. Tan and K. Lisa Yang Center for Autism Research at Massachusetts Institute of

7 Technology, Cambridge, MA

8 **\* Correspondence:**

9 Isaac Treves

10 [treves@mit.edu](mailto:treves@mit.edu)

11 **Keywords: Children, mindfulness, COVID-19, resilience, mental health, affect**

12 **Abstract**

13 An important aspect of mental health in children is emotional resilience, the capacity to adapt to,  
14 and recover from, stressors and emotional challenges. Variation in trait mindfulness, one's  
15 disposition to attend to experiences with an open and nonjudgmental attitude, may be an important  
16 individual difference in children that supports emotional resilience. In this study, we investigated  
17 whether trait mindfulness was related to emotional resilience in response to stressful changes in  
18 education and home-life during the COVID-19 pandemic in the United States. We conducted a  
19 correlational study examining self-report data from July 2020 to February 2021, from 163 eight-  
20 to-ten-year-old children living in the US. Higher trait mindfulness scores correlated with less  
21 stress, anxiety, depression, and negative affect in children, and lower ratings of COVID-19 impact  
22 on their lives. Mindfulness moderated the relationship between COVID-19 child impact and

## MINDFULNESS SUPPORTS EMOTIONAL RESILIENCE

23 negative affect. Children scoring high on mindfulness showed no correlation between rated  
24 COVID-19 impact and negative affect, whereas those who scored low on mindfulness showed a  
25 positive correlation between child COVID-19 impact and negative affect. Higher levels of trait  
26 mindfulness may have helped children to better cope with a wide range of COVID-19 stressors.  
27 Future studies should investigate the mechanisms by which trait mindfulness supports emotional  
28 resilience in children.

29

30

### **Introduction**

31

32 Mindfulness has been defined as “paying attention in a particular way: on purpose, in the  
33 present moment, and non-judgmentally” (Kabat-Zinn, 1994, p. 4). The benefits of mindfulness in  
34 children have been examined through the study of trait mindfulness and mindfulness training.  
35 Trait mindfulness refers to one’s disposition or tendency to attend to experiences with an open  
36 and nonjudgmental attitude (Brown & Ryan, 2003) and can be measured by self-report  
37 questionnaires (Brown et al., 2011; Greco et al., 2011; Lawlor et al., 2014). Mindfulness training  
38 aims to cultivate trait mindfulness through instruction and practice. Studies of both trait  
39 mindfulness and mindfulness instruction have documented benefits to child mental health (Greco  
40 et al., 2011; Zoogman et al., 2015; Dunning et al., 2019). An important aspect of mental health in  
41 children is *emotional resilience*, the capacity to overcome emotional challenges. Greater trait  
42 mindfulness in children has been associated with more resilience in response to bullying (Zhou et  
43 al., 2017). Here we asked whether greater trait mindfulness was a source of emotional resilience  
44 in response to stressful changes in education and home-life during the COVID-19 pandemic in  
45 the United States.

## MINDFULNESS SUPPORTS EMOTIONAL RESILIENCE

46           The COVID-19 pandemic severely and suddenly altered the educational, social, and  
47 home experiences of children. These changes presented serious challenges to mental health,  
48 including fear of health risks, social isolation, and more. Soon after the outbreak of COVID-19 in  
49 February and March 2020, studies reported increased loneliness, anxiety, depression, and sleep  
50 disturbances in adults complying with strict social distancing protocols in China (Li et al., 2020).  
51 As the pandemic unfolded, increased rates of mental health symptoms were observed in other  
52 countries around the world (Gloster et al., 2020). Some findings suggested increased prevalence  
53 of psychiatric symptoms like depression in older children (Xie et al., 2020; Zhou et al., 2020)  
54 and in girls (Oosterhoff et al., 2020). Other studies reported that some children experienced  
55 *improvements* in mental health outcomes during social distancing (Newlove-Delgado et al.,  
56 2021; Waite et al., 2021; Widnall et al., 2020). Further research is needed to understand why  
57 some children may be more resilient than others to the mental health challenges of the pandemic.

58           In this study, we operationalized emotional resilience as positive mental health outcomes  
59 in the context of adverse situations (Masten & Cicchetti, 2016). We did not measure resilience as  
60 a trait, but instead measured trait mindfulness as one of the cognitive and self-regulatory skills  
61 that contributes to resilience (Masten & Barnes, 2018). Researchers have highlighted  
62 mindfulness as a type of cognitive regulation of emotions (Gross, 2015), leading to a less self-  
63 critical or judgmental attitude towards one’s experiences (Bishop et al., 2004; Coffey et al.,  
64 2010) and greater attention to body sensations involved in emotion (Teper et al., 2013).  
65 Mindfulness may decrease rumination, stopping repetitive cycles of depressive thoughts, e.g.,  
66 “I’m worthless”; or anxious thoughts, e.g., “What if I never get it right?”, “Everything is going to  
67 fall apart” (Coffman et al., 2006; Williams, 2008). Most of these studies have examined adults,  
68 but there is also some evidence that greater trait mindfulness in children is associated with less

## MINDFULNESS SUPPORTS EMOTIONAL RESILIENCE

69 rumination and healthier patterns of emotion regulation (de Bruin et al., 2014). Trait mindfulness  
70 may support emotional resilience in children.

71 In this study, we examined children’s mental health outcomes during the COVID-19  
72 pandemic. The 163 eight-to-ten-year-old children were from families that volunteered to  
73 participate in a randomized controlled trial (RCT) examining the potential benefits of an  
74 audiobook intervention on reading outcomes. Data were collected remotely during the height of  
75 pandemic distancing restrictions, from July 2020 to February 2021. We assessed mental health  
76 using standardized self-report measures of anxiety, depression, and stress, and asked questions  
77 about negative affect. We also measured how strongly children felt they have been impacted by  
78 COVID-19. We assessed trait mindfulness with the Child and Adolescent Mindfulness Measure  
79 (CAMM), which emphasizes nonjudgmental, accepting attention to emotions (Greco et al.,  
80 2011).

81 We hypothesized that trait mindfulness would negatively correlate with self-report  
82 measures of anxiety, depression, stress and negative affect as has been reported before in  
83 children (Greco et al., 2011; de Bruin et al., 2014). Critically, we hypothesized that greater trait  
84 mindfulness would provide greater resilience to the changes of the COVID-19 pandemic by  
85 specifically moderating the relationship between self-reported COVID-19 impact and negative  
86 mental health outcomes.

87

88

89

### **Materials and Methods**

90

91 **Participants**

## MINDFULNESS SUPPORTS EMOTIONAL RESILIENCE

92

93           We analyzed the pre-intervention (baseline) data from children and their parents in a  
94 remote reading intervention study, collected from July 2020 through February 2021. Third and  
95 fourth-grade children across the United States were recruited through Facebook ads, schools,  
96 flyers, and word of mouth. We aimed to recruit children from lower socioeconomic status (SES)  
97 backgrounds and therefore reached out to school districts with high percentages of students  
98 eligible for free/reduced lunch and targeted Facebook ads to lower income zip codes across the  
99 country (for more on recruitment strategies see Ozernov-Palchik et al., 2022). Although we used  
100 multiple methods to target lower income families, the median income of our obtained sample  
101 was not as low as anticipated. Interested parents filled out an eligibility screen and were invited  
102 to participate in a baseline testing session if initial inclusionary criteria were met (**Supplement**).

103           We collected demographic information regarding participant gender, age, grade, mental  
104 health diagnosis, parent education level and annual household income. Parents reported their  
105 child's gender, and we did not inquire about sex assigned at birth. One self-report measure we  
106 used was normed by age and sex to derive T-scores – we used the reported gender of the child.

107           This project received Review Board approval at the Massachusetts Institute of  
108 Technology (MIT). We obtained informed consent from the parents of all participants as well as  
109 assent from the children over Zoom before they participated in the study.

110

### 111 **Measures**

112

113           We obtained self-reports through online questionnaires administered remotely through  
114 Research Electronic Data Capture (REDCap). REDCap is a secure, web-based application

## MINDFULNESS SUPPORTS EMOTIONAL RESILIENCE

115 designed to support data capture for research studies (Harris et al., 2009). Child questionnaires  
116 were administered over Zoom, a secure video chat platform. Experimenters read the assessment  
117 questions to the children who followed along on their computer screen and answered aloud.  
118 Children were compensated 20 dollars per hour of testing.

119

### 120 *Child COVID Impact*

121

122 In order to assess the impact of COVID-19 on children we devised a brief Child COVID  
123 Impact Scale. This scale consists of 7 items which are rated on a 4-point Likert scale, ranging  
124 from ‘not at all’ to ‘a lot’ (**Supplement**). The initial question asks how much the child has been  
125 bothered by COVID and the following questions pertain to the impact of COVID on their daily  
126 activities and their ability to see family members and friends. For each of these categories the  
127 child is first asked how much harder it has been to engage in their daily activities, or to see  
128 family or friends, and then is asked how much they are bothered by those specific changes.  
129 Children who respond to the initial question of each category with ‘not at all’ are not asked the  
130 follow-up question. In those cases, the follow-up questions are automatically assigned the lowest  
131 rating of ‘1’. Scores range from 7 to 28, with higher scores indicative of greater COVID impact.  
132 This scale demonstrated a Cronbach’s alpha of .73.

133

134

### 135 *Depression & Anxiety*

136

## MINDFULNESS SUPPORTS EMOTIONAL RESILIENCE

137 To measure child-reported anxiety and depressive symptoms we used the 25-item  
138 Revised Child Anxiety and Depression Scale (RCADS-25-C) (Ebesutani et al., 2012), including  
139 the following scales: Anxiety Total scale and Depression Total scale. All items are based on  
140 Diagnostic and Statistical Manual of Mental Disorders–Fourth edition criteria (4th ed.; *DSM-IV*;  
141 American Psychiatric Association, 1994). The items in the Anxiety Total scale measure a “broad  
142 anxiety” dimension, assessing a variety of anxiety symptoms. The items in the Depression Total  
143 scale measure symptoms of major depressive disorder. Higher scores represent a greater degree  
144 of symptoms. Raw summative scores from each of the scales are converted into *T*-scores, with  
145 the following ranges: low severity (0-64), medium severity (65-70), and high severity (>70). *T*-  
146 scores of medium severity are considered to be “borderline clinical threshold” whereas *T*-scores  
147 of high severity are considered to be “above clinical threshold” (Chorpita et al., 2000). For this  
148 study the alpha coefficients were .74 and .70 for the Anxiety and Depression scores respectively.

149

### 150 *Negative Affect*

151

152 To measure children’s affect we administered a brief 13-item questionnaire (Panorama  
153 Education, 2015). Children rated the degree to which they felt each of thirteen emotions in the  
154 past week, using a 5-point Likert scale ranging from ‘almost never’ to ‘almost always.’ We  
155 calculated a Negative Affect score from the seven items asking about negative affect: mad,  
156 bored, lonely, sad, nervous, worried, and afraid. This Negative Affect factor was supported by  
157 confirmatory factor analyses (**Supplement**). The composite score ranges from 5 to 35, with  
158 higher scores representing more negative affect. The alpha coefficient for this scale was .71.

159

## MINDFULNESS SUPPORTS EMOTIONAL RESILIENCE

### 160 *Perceived Stress*

161

162 To measure stress, we administered the Perceived Stress Scale for Children (PSS-C)  
163 (White, 2014). This self-report measure consists of 13 items on a 4-point Likert scale ranging  
164 from ‘never’ to a ‘lot.’ The questions assess perceived stress related to time pressure, academic  
165 performance, and relationships with family and friends. A higher score indicates a greater level  
166 of perceived stress. For this study the alpha coefficient was .62.

167

### 168 *Mindfulness*

169

170 To assess trait mindfulness, we administered the Child and Adolescent Mindfulness  
171 Measure (CAMM) (Greco et al., 2011). This self-report scale consists of 10 items querying the  
172 frequency of non-mindful thoughts or behaviors on a 5-point Likert scale from ‘never true’ to  
173 ‘always true.’ All items are negatively worded and reverse-scored. Higher scores represent  
174 greater levels of mindfulness. Specifically, the authors describe the scale as measuring both  
175 awareness of the present and the degree to which one has a nonjudgmental attitude towards one’s  
176 thoughts and feelings, which includes not suppressing or avoiding them. In this study the alpha  
177 coefficient was .77.

178

179

180

### 181 **Analysis Methods**

182



## MINDFULNESS SUPPORTS EMOTIONAL RESILIENCE

183 All analyses were conducted in R. We first calculated descriptive statistics for the scales  
184 and demographics. Then we conducted linear multivariate analyses, beginning with the  
185 distributions. For scales with more than 3 items, we assumed missing data was at random, and  
186 imputed missing item responses (0.17%) with the *mice* package, using predictive mean matching  
187 (van Buuren & Groothuis-Oudshoorn, 2011). Then, the data were *z*-scored or *t*-scored where  
188 applicable (i.e. the RCADS composites), and outliers were removed if above or below 3 SD of  
189 the mean. Resulting distributions were assessed to make sure skewness  $< |2|$ . We then assessed  
190 bivariate relationships among our main variables of interest. Note that we refer to anxiety,  
191 depression, perceived stress and negative affect as mental health outcomes, Child COVID-19  
192 Impact as a predictor, and CAMM as a moderator. We calculated correlations between Child  
193 COVID Impact, the four mental health outcomes, and CAMM. We corrected *p*-values across the  
194 four outcome measures (i.e., the different mental health symptoms) using false discovery rate  
195 correction (FDR) (Benjamini & Hochberg, 1995).

196 We then conducted a set of moderation analyses using linear regressions (package: *lm*).  
197 Our main hypothesis was that the relationship between children's COVID Impact and their  
198 mental health symptoms would be moderated by mindfulness. We thus estimated four separate  
199 linear models, controlling for age, gender, and maternal education. Moderators and predictors  
200 were *z*-transformed and all variables were introduced in one step for estimation. The specific  
201 outcome of interest is the interaction between Child COVID Impact and mindfulness. We report  
202 fit statistics, slope coefficients (standardized *betas*), and variance explained. For interpretation of  
203 the interaction effects we use median splits for visualization and simple slope analysis (Aiken &  
204 West, 1991) which entails probing effects at  $\pm 1$  SD from the mean of mindfulness.

205

## MINDFULNESS SUPPORTS EMOTIONAL RESILIENCE

### 206 **Results**

207

#### 208 **Demographics**

209 The average age of the 163 children (87 male) was 9 years, 5 months ( $SD = 6$  months,  
210 range 8;2-10;6). The median household income range was 80,000-120,000 US Dollars (**Fig. S1**).  
211 Levels of maternal education were high, with a majority having at least a bachelor's degree (**Fig.**  
212 **S2**). The majority of children came from the states of Georgia, Massachusetts, California, and  
213 Texas. Parents reported the racial identities of their children - 45.4% were White, 17.8%  
214 Multiracial, 18.4% Latino/Hispanic, 9.2 % Asian, 2.5% Black or African American, 1.2 % Other,  
215 and 5.5% chose not to respond. By parental report, 10 children had clinical diagnoses of anxiety,  
216 24 were diagnosed with Attention-Deficit/Hyperactivity Disorder (ADHD), and five had been  
217 diagnosed with both ADHD and anxiety.

218

#### 219 **Mental health variables**

220 Descriptive statistics for the main variables of interest are shown in **Table 1**, including  
221 means and standard deviations of negative affect, RCADS anxiety and depression subscales, PSS-  
222 C, CAMM and COVID-Impact. *T*-scores for RCADS were relatively low. On the anxiety scale all  
223 children fell in the low severity range (0-65) and on the depression scale only two children fell in  
224 the moderate range (65-70), with one falling in the severe range (>70).

225 -----Table 1-----

226

227

#### 228 **Bivariate Relationships**

It is made available under a [CC-BY 4.0 International license](https://creativecommons.org/licenses/by/4.0/) .

## MINDFULNESS SUPPORTS EMOTIONAL RESILIENCE

229 Correlations for the main variables of interest are shown in **Table 1**. Measures of mental  
230 health symptoms showed strong intercorrelations ( $r$ s from .4 to .6, all  $p$ s < .0001). Mindfulness  
231 had strong negative relationships with mental health symptoms (all  $p$ s < .0001). COVID Impact  
232 as reported by children showed a smaller but significant positive correlation with negative affect  
233 ( $r(163) = .18, p = .029$ , FDR-corrected) and RCADS-Anxiety ( $r(163) = .21, p = .028$ , FDR-  
234 corrected), and a similar negative correlation with mindfulness ( $r(163) = -.21, p = .028$ , FDR-  
235 corrected).

236 -----Table 2-----

237

### 238 **Moderation analyses**

239

240 Mindfulness significantly moderated the relationship between COVID-Impact and  
241 negative affect in the children (**Table 2**). We further investigated this relationship using simple  
242 slopes analysis. High mindfulness (+1SD) children showed no relationship between COVID-  
243 Impact scores and Negative Affect scores ( $\beta = -.11, SE = 0.11, p = .31$ ), whereas low mindfulness  
244 (-1SD) children had a positive relationship between COVID-Impact scores and Negative Affect  
245 scores ( $\beta = 0.27, SE = 0.11, p = .018$ ). This is also depicted in a median split (**Figure 2**). Gender  
246 was the only control variable to reach significance, where female children showed higher negative  
247 affect than males. We probed this gender vs. negative affect relationship without the other  
248 variables, and it was trend-level in the full sample ( $t(161) = -1.8, p = .07$ ). No other main  
249 moderation analyses (with depression, anxiety or stress) were significant (**Tables S1-3**).

250 -----Figure 1-----

251

## MINDFULNESS SUPPORTS EMOTIONAL RESILIENCE

252

### Discussion

253

254           In this study, we found evidence that mindfulness was related to emotional resilience in  
255 children. We specifically investigated whether trait mindfulness was associated with more positive  
256 mental health outcomes in response to the severe life changes of the COVID-19 pandemic. We  
257 obtained self-report data from US children during the height of pandemic distancing restrictions,  
258 from July 2020 to February 2021. Greater trait mindfulness was associated with less stress, anxiety,  
259 depression, and negative affect. Greater mindfulness was also associated with lower children's  
260 ratings on the impact of COVID-19 on their lives. Critically, trait mindfulness moderated the  
261 relationship between COVID-19 child impact and negative affect. Children scoring high on  
262 mindfulness showed no correlation between rated COVID-19 impact and negative affect, whereas  
263 those who scored low on mindfulness showed a positive correlation between child COVID-19  
264 impact and negative affect. Overall, higher levels of trait mindfulness may have helped children  
265 to better cope with a wide range of COVID-19 stressors.

266           To assess COVID-19 impact, we asked children questions like ‘how much harder has it  
267 been to see friends during the pandemic?’ During pandemic-related lockdowns, children may find  
268 it harder to see friends and understandably experience negative emotions like frustration and  
269 loneliness about such isolation. However, the degree to which they blame themselves for these  
270 emotions, try to avoid feeling them, and generally get caught up in their emotions as opposed to  
271 having a healthy distance from them, may play a role in overall mental health outcomes. In our  
272 study, trait mindfulness was associated with more positive mental health outcomes, as in prior  
273 work (de Bruin et al., 2014; Greco et al., 2011; Lawlor et al., 2014), and lower COVID-19 stress.

## MINDFULNESS SUPPORTS EMOTIONAL RESILIENCE

274 Perhaps higher trait mindfulness means less self-blame and judgment, which in turn supports  
275 emotional resilience to pandemic related stressors.

276 Two theoretical foundations of mindfulness are attention to the present and non-judgement  
277 (Bishop et al., 2004). Some trait mindfulness scales like the Mindful Awareness Attention Scale  
278 (MAAS) focus on the attentional construct (Goodman et al., 2017; Grossman, 2011), whereas the  
279 Child and Adolescent Mindfulness Measure (CAMM), administered in this study, focuses on the  
280 construct of non-judgement. The CAMM aims to capture propensities to self-blame and judge  
281 one's feelings (e.g. "I get upset with myself for having certain thoughts"). Lower scores on the  
282 CAMM correlate with less adaptive strategies to cope with one's emotions, such as rumination,  
283 catastrophizing, and suppression (de Bruin et al., 2014; Greco et al., 2011). Consistent with these  
284 prior studies, our study showed that mindfulness moderated the relationship between pandemic  
285 stress and negative affect. Mindfulness may support emotional resilience through the mechanisms  
286 of non-judgement and acceptance of emotions.

287 This study connects mindfulness to positive mental health outcomes in children during the  
288 pandemic. This finding is consistent with studies showing that self-reported mindfulness correlated  
289 with lower psychological distress in adults during the pandemic (Conversano et al., 2020; Dillard  
290 & Meier, 2021; Lam, Lam & Chung, 2022; Sun, Goldberg, et al., 2021), as well as an RCT study  
291 showing that a four-week mobile-phone mindfulness intervention reduced anxiety symptoms in  
292 university students under quarantine (Sun, Lin, et al., 2021). Mindfulness interventions may help  
293 children cope with adverse events like the COVID-19 pandemic.

294 Several limitations of this study may be noted. First, the children and their families were  
295 self-selected participants in a multi-week intervention study. Self-selection yielded a more  
296 educated and higher income sample than originally intended. The majority of children were from

It is made available under a [CC-BY 4.0 International license](https://creativecommons.org/licenses/by/4.0/) .

## MINDFULNESS SUPPORTS EMOTIONAL RESILIENCE

297 high SES families, and thus may not represent the kinds of children who were most vulnerable to  
298 the life disruptions of the COVID-19 pandemic. In fact, on average, children in this study reported  
299 lower rates of clinical anxiety and depression than norms for the measures (mean *T*-scores for our  
300 sample were 42% and 43% respectively). Some studies have reported that the sudden and severe  
301 changes on account of the pandemic, such as school closures and social isolation from peers, had  
302 broad, negative influences on children (Leeb et al., 2020; Shah et al., 2020; Singh et al., 2020).  
303 The children in the present study, however, appeared to be adapting well to the pandemic (although  
304 we cannot exclude the possibility of children wanting to report socially desirable responses). Other  
305 limitations were that the covid-specific questionnaire was invented for the study and not  
306 standardized, and that remote test administration is not standard for the field.

307 A final limitation is that this is a correlational study that cannot determine that mindfulness  
308 causes emotional resilience. Moderation analyses cannot provide cause-and-effect evidence  
309 (rather, they show how a relationship between survey constructs can be altered by a third variable).  
310 Other studies on trait mindfulness and resilience have adopted different approaches. For example,  
311 Park et al. 2021 assessed COVID-related distress in adults at three time-points. They found  
312 baseline mindfulness not only correlated with less distress at follow-up, but also correlated with  
313 more substantial decreases in distress over time. Similar longitudinal studies in children could be  
314 used to best assess whether mindfulness promotes emotional resilience *in response* to COVID-19  
315 stressors.

316 Despite these limitations, the present finding that trait mindfulness moderated the  
317 relationship between pandemic stress and negative affect suggests that mindfulness supports  
318 resilience in the face of adverse experience. There is substantial evidence in adults that trait  
319 mindfulness promotes resilience to COVID-19 stressors (Belen, 2022; Majeed et al., 2020; Park

It is made available under a [CC-BY 4.0 International license](https://creativecommons.org/licenses/by/4.0/) .

## MINDFULNESS SUPPORTS EMOTIONAL RESILIENCE

320 et al., 2021; Saricali et al., 2022; Vos et al., 2021; Zheng et al., 2020). For example, Vos et al.  
321 (2021) found that worry about COVID-19 was only associated with anxiety for adults with low  
322 but not high mindfulness. What is the specific mechanism by which mindfulness promotes  
323 emotional resilience in the face of adversity? One idea is that mindfully treating experiences in a  
324 non-judgmental and accepting manner could help individuals decrease depressive rumination  
325 (Coffman et al., 2006; Williams, 2008). Alternatively, or additionally, mindfulness practices like  
326 body scans that involve present-moment attention to body sensations may be key to the benefits  
327 of mindfulness. These practices may support more accurate appraisals of bodily sensations and  
328 diminish anxiety (Teper et al., 2013; Farb et al., 2014; Treves et al., 2019). Further mindfulness  
329 research could help identify which cognitive and affective traits of children allow them to  
330 meaningfully and constructively respond to emotional challenges.

331 The finding that mindfulness in children moderated negative affect in response to the  
332 sudden, comprehensive, and chronic disruptions of school and home life brought on by a global  
333 pandemic, further motivates research into the implementation of mindfulness instruction for  
334 children. The present findings are consistent with evidence from randomized controlled trials that  
335 mindfulness interventions can reduce stress and negative affect in children (Zoogman et al., 2015).  
336 In one study, reductions in stress after a school-based mindfulness intervention were associated  
337 with changes in brain function (Bauer et al., 2019). Taken together, these findings encourage the  
338 adoption of mindfulness instruction in schools or other settings to help children be more  
339 emotionally resilient.

340

341

## References

342

## MINDFULNESS SUPPORTS EMOTIONAL RESILIENCE

- 343 Aiken, L. S., & West, S. G. (1991). *Multiple regression: Testing and interpreting interactions*. Sage Publications,  
344 Inc.
- 345 American Psychiatric Association (1994). *Diagnostic and statistical manual of mental disorders* (4th ed.).  
346 Washington, DC: American Psychiatric Association.
- 347 Bauer, C. C. C., Caballero, C., Scherer, E., West, M. R., Mrazek, M. D., Phillips, D. T., Whitfield-Gabrieli, S., &  
348 Gabrieli, J. D. E. (2019). Mindfulness training reduces stress and amygdala reactivity to fearful faces in  
349 middle-school children. *Behavioral Neuroscience*, *133*(6), 569–585. <https://doi.org/10.1037/bne0000337>
- 350 Belen, H. (2022). Fear of COVID-19 and mental health: The role of mindfulness during times of crisis. *International*  
351 *Journal of Mental Health and Addiction*, *20*(1), 607–618. <https://doi.org/10.1007/s11469-020-00470-2>
- 352 Benjamini, Y., & Hochberg, Y. (1995). Controlling the false discovery rate: A practical and powerful approach to  
353 multiple testing. *Journal of the Royal Statistical Society: Series B (Methodological)*.  
354 <https://doi.org/10.1111/j.2517-6161.1995.tb02031.x>
- 355 Bishop, S. R., Lau, M., Shapiro, S., Carlson, L., Anderson, N. D., Carmody, J., Segal, Z. V., Abbey, S., Speca, M.,  
356 Velting, D., & Devins, G. (2004). Mindfulness: A proposed operational definition. *Clinical Psychology:*  
357 *Science and Practice*, *11*(3), 230–241. <https://doi.org/10.1093/clipsy.bph077>
- 358 Brown, K. W., & Ryan, R. M. (2003). The benefits of being present: Mindfulness and its role in psychological well-  
359 being. *Journal of Personality and Social Psychology*, *84*(4), 822-848. [https://doi.org/10.1037/0022-](https://doi.org/10.1037/0022-3514.84.4.822)  
360 [3514.84.4.822](https://doi.org/10.1037/0022-3514.84.4.822)
- 361 Brown, K. W., West, A. M., Loverich, T. M., & Biegel, G. M. (2011). Assessing adolescent mindfulness: Validation  
362 of an adapted mindful attention awareness scale in adolescent normative and psychiatric populations.  
363 *Psychological Assessment*, *23*(4), 1023-1033. <https://doi.org/10.1037/a0021338>
- 364 de Bruin, E. I., Zijlstra, B. J. H., & Bögels, S. M. (2014). The meaning of mindfulness in children and adolescents:  
365 Further validation of the child and adolescent mindfulness measure (CAMM) in two independent samples  
366 from the Netherlands. *Mindfulness*, *5*, 422-430. <https://doi.org/10.1007/s12671-013-0196-8>
- 367 Chorpita, B. F., Yim, L. M., Moffitt, C. E., Umemoto L. A., & Francis, S.E. (2000). Assessment of symptoms of  
368 DSM-IV anxiety and depression in children: A revised child anxiety and depression scale. *Behaviour*  
369 *Research and Therapy*, *38*, 835-855. doi: 10.1016/s0005-7967(99)00130-8
- 370 Coffey, K. A., Hartman, M., & Fredrickson, B. L. (2010). Deconstructing mindfulness and constructing mental



## MINDFULNESS SUPPORTS EMOTIONAL RESILIENCE

- 371 health: Understanding mindfulness and its mechanisms of action. *Mindfulness*, *1*, 235-253.  
372 <https://doi.org/10.1007/s12671-010-0033-2>
- 373 Coffman, S. J., Dimidjian, S., & Baer, R. A. (2006). Mindfulness-based cognitive therapy for prevention of  
374 depressive relapse. In: Baer, R.A. (ed) Mindfulness-based treatment approaches. Burlington, MA.:  
375 Academic Press. <https://doi.org/10.1016/B978-012088519-0/50003-4>
- 376 Conversano, C., Di Giuseppe, M., Miccoli, M., Ciacchini, R., Gemignani, A., & Orrù, G. (2020). Mindfulness, age  
377 and gender as protective factors against psychological distress during COVID-19 pandemic. *Frontiers in*  
378 *Psychology*, *11*, 1–9. <https://doi.org/10.3389/fpsyg.2020.01900>
- 379 Dillard, A. J., & Meier, B. P. (2021). Trait mindfulness is negatively associated with distress related to COVID-19.  
380 *Personality and Individual Differences*, *179*(April), 110955. <https://doi.org/10.1016/j.paid.2021.110955>
- 381 Dunning, D.L., Griffiths, K., Kuyken, W., Crane, C., Foulkes, L., Parker, J., & Dalgleish, T. (2019). Research  
382 review: The effects of mindfulness-based interventions on cognition and mental health in children and  
383 adolescents – A meta-analysis of randomized controlled trials. *Journal of Child Psychology and Psychiatry*,  
384 *60*: 244-258. doi: 10.1111/jcpp.12980
- 385 Ebesutani, C., Reise, S., Chorpita, B. F., Ale, C., Regan, J., Young, J., Higa-McMillan, C., & Weisz, J. R. (2012).  
386 The revised child anxiety and depression scale - Short version: Scale reduction via exploratory bifactor  
387 modeling of the broad anxiety factor. *Psychological Assessment*, *24*, 833-845. doi: 10.1037/a0027283
- 388 Farb, N. A. S., Anderson, A. K., Irving, J. A., & Segal, Z. V. (2014). Mindfulness interventions and emotion  
389 regulation. In J. J. Gross (Ed.), *Handbook of emotion regulation* (pp. 548–567). The Guilford Press.
- 390 Gloster, A. T., Lamnisos, D., Lubenko, J., Giovambattista, P., Squatrito, V., Constantinou, M., Nicolaou, C.,  
391 Papacostas, S., Aydin, G., Chong, Y. Y., Chien, W. T., Cheng, H. Y., Ruiz, F. J., Garcia-Martin, M. B.,  
392 Obando-Posada, D. P., Segura-Vargas, M. A., Vasiliou, V. S., McHugh, L., Höfer, S., ... Karekla, M.  
393 (2020). Impact of COVID-19 pandemic on mental health: An international study. *Plos One*, *15*(12).  
394 <https://doi.org/10.1371/journal.pone.0244809>
- 395 Goodman, M. S., Madni, L. A., & Semple, R. J. (2017). Measuring mindfulness in youth: Review of current  
396 assessments, challenges, and future directions. *Mindfulness*, *8*(6), 1409–1420.  
397 <https://doi.org/10.1007/s12671-017-0719-9>
- 398 Greco, L. A., Baer, R. A., & Smith, G. T. (2011). Assessing mindfulness in children and adolescents: Development

## MINDFULNESS SUPPORTS EMOTIONAL RESILIENCE

- 399 and validation of the child and adolescent mindfulness measure (CAMP). *Psychological Assessment*,  
400 23(3), 606-614. doi: 10.1037/a0022819
- 401 Gross, J. J. (2015). Emotion regulation: Current status and future prospects. *Psychological Inquiry*, 26(1), 1–26.  
402 <https://doi.org/10.1080/1047840X.2014.940781>
- 403 Grossman, P. (2011). Defining mindfulness by how poorly I think I pay attention during everyday awareness and  
404 other intractable problems for psychology's (re)invention of mindfulness: comment on Brown et al. (2011).  
405 *Psychological Assessment*, 23(4), 1034–1040. doi: 10.1037/a0022713
- 406 Harris, P. A., Taylor, R., Thielke, R., Payne, J., Gonzalez, N., & Conde, J. G. (2009). Research electronic data  
407 capture (REDCap) -- A metadata-driven methodology and workflow process for providing translational  
408 research informatics support. *Journal of Biomedical Informatics*, 42(2), 377-381. doi:  
409 10.1016/j.jbi.2008.08.010
- 410 Kabat-Zinn, J. (1994). *Mindfulness meditation for everyday life*. New York: Hyperion.
- 411 Lam, C. B., Lam, C. S., & Chung, K. K. H. (2022). Does mindfulness moderate the link of worry about COVID-19  
412 with adjustment? An actor-partner interdependence model approach. *Mindfulness*, 13(3), 627–636.  
413 <https://doi.org/10.1007/s12671-021-01818-y>
- 414 Lawlor, M. S., Schonert-Reichl, K. A., Gadermann, A. M., & Zumbo, B. D. (2014). A validation study of the  
415 mindful attention awareness scale adapted for children. *Mindfulness*, 5(6), 730-741.  
416 <https://doi.org/10.1007/s12671-013-0228-4>
- 417 Leeb, R. T., Bitsko, R. H., Radhakrishnan, L., Martinez, P., Nijai, R., & Holland, K. M. (2020). Mental health-  
418 related emergency department visits among children aged <18 years during the COVID-19 pandemic –  
419 United States, January 1- October 17, 2020. *MMWR Morb Mortal Wkly Rep* 2020; 69:1675-1680.  
420 <http://dx.doi.org/10.15585/mmwr.mm6945a3>
- 421 Li, W., Yang, Y., Liu, Z., Zhao, Y., Zhang, Q., Zhang, L., Cheung, T., & Xiang, Y.-T. (2020). Progression of mental  
422 health services during the COVID-19 outbreak in China. *International Journal of Biological Sciences*,  
423 16(10), 1732-1738. doi:10.7150/ijbs.45120
- 424 Majeed, M., Irshad, M., Fatima, T., Khan, J., & Hassan, M. M. (2020). Relationship between problematic social  
425 media usage and employee depression: A moderated mediation model of mindfulness and fear of COVID-  
426 19. *Frontiers in Psychology*, 11(December), 1–13. <https://doi.org/10.3389/fpsyg.2020.557987>

## MINDFULNESS SUPPORTS EMOTIONAL RESILIENCE

- 427 Masten, A. S., & Cicchetti, D. (2016). Resilience in development: Progress and transformation.
- 428 Masten, A., & Barnes, A. (2018). Resilience in Children: Developmental Perspectives. *Children*, 5(7), 98.
- 429 <https://doi.org/10.3390/children5070098>
- 430 Newlove-Delgado, T., McManus, S., Sadler, K., Thandi, S., Vizard, T., Cartwright, C., & Ford, T. (2021). Child
- 431 mental health in England before and during the COVID-19 lockdown. *The Lancet: Psychiatry*, 8(5), 353-
- 432 354. doi: [https://doi.org/10.1016/S2215-0366\(20\)30570-8](https://doi.org/10.1016/S2215-0366(20)30570-8)
- 433 Oosterhoff, B., Palmer, C. A., Wilson, J., & Shook, N. (2020). Adolescents' motivations to engage in social
- 434 distancing during the COVID-19 pandemic: Associations with mental and social health. *Journal of*
- 435 *Adolescent Health*, 67(2), 179-185. doi: 10.1016/j.jadohealth.2020.05.004
- 436 Ozernov-Palchik, O., Olson, H. A., Arechiga, X. M., Kentala, H., Solorio-Fielder, J. L., Wang, K. L., Torres, Y. C.,
- 437 Gardino, N. D., Dieffenbach, J. R., & Gabrieli, J. D. E. (2022). Implementing remote developmental
- 438 research: A case study of a randomized controlled trial language intervention during COVID-19. *Frontiers*
- 439 *in Psychology*, 12(January), 1–20. <https://doi.org/10.3389/fpsyg.2021.734375>
- 440 Panorama Education (2015). User guide: panorama social-emotional learning survey. Retrieved from
- 441 <https://www.panoramaed.com/social-emotional-learning-sel>
- 442 Park, C. L., Finkelstein-Fox, L., Russell, B. S., Fendrich, M., Hutchison, M., & Becker, J. (2021). Psychological
- 443 resilience early in the COVID-19 pandemic: Stressors, resources, and coping strategies in a national sample
- 444 of Americans. *American Psychologist*, 76(5), 715–728. <https://doi.org/10.1037/amp0000813>
- 445 Saricali, M., Satici, S. A., Satici, B., Gocet-Tekin, E., & Griffiths, M. D. (2022). Fear of COVID-19, mindfulness,
- 446 humor, and hopelessness: A multiple mediation analysis. *International Journal of Mental Health and*
- 447 *Addiction*, 20(4), 2151–2164. <https://doi.org/10.1007/s11469-020-00419-5>
- 448 Shah, K., Mann, S., Singh, R., Bangar, R., & Kulkarni, R. (2020). Impact of COVID-19 on the mental health of
- 449 children and adolescents. *Cureus*, 12(8): e10051. doi: 10.7759/cureus.10051
- 450 Singh, S., Roy, D., Sinha, K., Parveen, S., Sharma, G., & Joshi, G. (2020). Impact of COVID-19 and lockdown on
- 451 mental health of children and adolescents: A narrative review with recommendations. *Psychiatry Research*.
- 452 doi: 10.1016/j.psychres.2020.113429
- 453 Sun, S., Goldberg, S. B., Lin, D., Qiao, S., & Operario, D. (2021). Psychiatric symptoms, risk, and protective factors
- 454 among university students in quarantine during the COVID-19 pandemic in China. *Globalization and*

## MINDFULNESS SUPPORTS EMOTIONAL RESILIENCE

- 455 *Health*, 17(1), 15. <https://doi.org/10.1186/s12992-021-00663-x>
- 456 Sun, S., Lin, D., Goldberg, S., Shen, Z., Chen, P., Qiao, S., Brewer, J., Loucks, E., & Operario, D. (2021). A  
457 mindfulness-based mobile health (mHealth) intervention among psychologically distressed university  
458 students in quarantine during the COVID-19 pandemic: A randomized controlled trial. *Journal of*  
459 *Counseling Psychology*. Advance online publication. <https://doi.org/10.1037/cou0000568>
- 460 Teper, R., Segal, Z. V., & Inzlicht, M. (2013). Inside the mindful mind: How mindfulness enhances emotion  
461 regulation through improvements in executive control. *Current Directions in Psychological Science*, 22(6),  
462 449–454. <https://doi.org/10.1177/0963721413495869>
- 463 Treves, I. N., Tello, L. Y., Davidson, R. J., & Goldberg, S. B. (2019). The relationship between mindfulness and  
464 objective measures of body awareness: A meta-analysis. *Scientific Reports*, 9(1), 1–12.  
465 <https://doi.org/10.1038/s41598-019-53978-6>
- 466 van Buuren, S., & Groothuis-Oudshoorn, K. (2011). mice: Multivariate imputation by chained equations in  
467 R. *Journal of Statistical Software*, 45(3), 1 - 67. doi: 10.18637/jss.v045.i03
- 468 Vos, L. M. W., Habibović, M., Nyklíček, I., Smeets, T., & Mertens, G. (2021). Optimism, mindfulness, and  
469 resilience as potential protective factors for the mental health consequences of fear of the coronavirus.  
470 *Psychiatry Research*, 300(December 2020), 0–7. <https://doi.org/10.1016/j.psychres.2021.113927>
- 471 Waite, P., Pearcey, S., Shum, A., Raw, J. A. L., Patalay, P., & Creswell, C. (2021). How did the mental health  
472 symptoms of children and adolescents change over early lockdown during the COVID-19 pandemic in the  
473 UK? *JCPP Advances*, 1(1), 1–10. doi: 10.31234/osf.io/t8rfx
- 474 White, B. P. (2014). The perceived stress scale for children: A pilot study in a sample of 153 children. *International*  
475 *Journal of Pediatrics and Child Health*, 2, 45-52. <http://dx.doi.org/10.12974/2311-8687.2014.02.02.4>
- 476 Widnall, E., Winstone, L., Mars, B., Haworth, C. M. A., & Kidger, J. (2020). Young people's mental health during  
477 the COVID-19 pandemic. *University of Bristol*.
- 478 Williams, J. M. G. (2008). Mindfulness, depression, and modes of mind. *Cognitive Therapy and Research* 2008  
479 32:6, 32(6), 721–733. <https://doi.org/10.1007/s10608-008-9204-z>
- 480 Xie, X., Xue, Q., Zhou, Y., Zhu, K., Liu, Q., Zhang, J., & Song, R. (2020). Mental health status among children in  
481 home confinement during the coronavirus disease 2019 outbreak in Hubei Province, China. *JAMA*  
482 *Pediatrics*, 174(9), 898-900. doi:10.1001/jamapediatrics.2020.1619

It is made available under a [CC-BY 4.0 International license](https://creativecommons.org/licenses/by/4.0/) .

## MINDFULNESS SUPPORTS EMOTIONAL RESILIENCE

- 483 Zheng, M. X., Masters-Waage, T. C., Yao, J., Lu, Y., Tan, N., & Narayanan, J. (2020). Stay mindful and carry on:  
484 Mindfulness neutralizes COVID-19 stressors on work engagement via sleep duration. *Frontiers in*  
485 *Psychology, 11*(December). <https://doi.org/10.3389/fpsyg.2020.610156>
- 486 Zhou, Z.-K., Liu, Q.-Q., Niu, G.-F., Sun, X.-J., & Fan, C.-Y. (2017). Bullying victimization and depression in  
487 Chinese children: A moderated mediation model of resilience and mindfulness. *Personality and Individual*  
488 *Differences, 104*, 137–142. <https://doi.org/10.1016/j.paid.2016.07.040>
- 489 Zhou, S.-J., Zhang, L.-G., Wang, L.-L., Guo, Z.-C., Wang, J.-Q., Chen, J.-C., Liu, M., Chen, X., & Chen, J.-X.  
490 (2020). Prevalence and socio-demographic correlates of psychological health problems in Chinese  
491 adolescents during the outbreak of COVID-19. *European Child Adolescent Psychiatry, 29*(6), 749-758.  
492 <https://doi.org/10.1007/s00787-020-01541-4>
- 493 Zoogman, S., Goldberg, S. B., Hoyt, W. T., & Miller, L. (2015). Mindfulness interventions with youth: A meta-  
494 analysis. *Mindfulness, 6*(2), 290–302. <https://doi.org/10.1007/s12671-013-02>

## MINDFULNESS SUPPORTS EMOTIONAL RESILIENCE

### 495 **Table 1**

496 *Bivariate correlations and descriptive statistics for main variables of interest.*

497

498

| Scale            | NAffect   | Anxiety   | Depression | Stress    | CAMM   | Mean  | S.D. |
|------------------|-----------|-----------|------------|-----------|--------|-------|------|
| NAffect          |           |           |            |           |        | 14.20 | 4.66 |
| Anxiety          | 0.45****  |           |            |           |        | 41.32 | 7.17 |
| Depression       | 0.42****  | 0.59****  |            |           |        | 43.85 | 8.18 |
| Stress           | 0.41****  | 0.49****  | 0.55****   |           |        | 10.87 | 4.91 |
| CAMM             | -0.38**** | -0.50**** | -0.49****  | -0.40**** |        | 27.05 | 6.63 |
| COVID-<br>Impact | 0.18*     | 0.21*     | 0.07       | 0.02      | -0.21* | 14.22 | 4.72 |

499

500 NAffect = Negative Affect, Anxiety = RCADS-Anxiety, Depression = RCADS-Depression,

501 Stress = PSSTotal-C, CAMM = Child and Adolescent Mindfulness Measure.

502 Mean anxiety and depression scores are *t*-scores. \*,  $p < 0.05$ , \*\*\*\*  $p < 0.0001$

503

504

505

506

## MINDFULNESS SUPPORTS EMOTIONAL RESILIENCE

507 **Table 2**

508 *Mindfulness is a moderator of the relationship between COVID Impact and Negative Affect.*

509

| <b>Model: Negative Affect</b> | $\beta$ | Standard Error | t value | P      | Sig. |
|-------------------------------|---------|----------------|---------|--------|------|
| COVID Impact                  | 0.081   | 0.081          | 0.994   | 0.3222 |      |
| CAMM                          | -0.394  | 0.083          | -4.773  | 0.0000 | ***  |
| Gender                        | -0.396  | 0.160          | -2.482  | 0.0143 | *    |
| Age                           | 0.042   | 0.081          | 0.526   | 0.5996 |      |
| Maternal Education            | -0.081  | 0.078          | -1.027  | 0.3063 |      |
| COVID Impact X CAMM           | -0.192  | 0.077          | -2.482  | 0.0143 | *    |

Multiple R-squared: 0.2225, Adjusted R-squared: 0.1871. \*,  $p < 0.05$ , \*\*\*  $p < 0.001$

510

511

512

513

514

515

516

517

## MINDFULNESS SUPPORTS EMOTIONAL RESILIENCE

### 518 **Figure 1**

519 *Relationship between child COVID-Impact and Negative Affect, median split by mindfulness.*

520

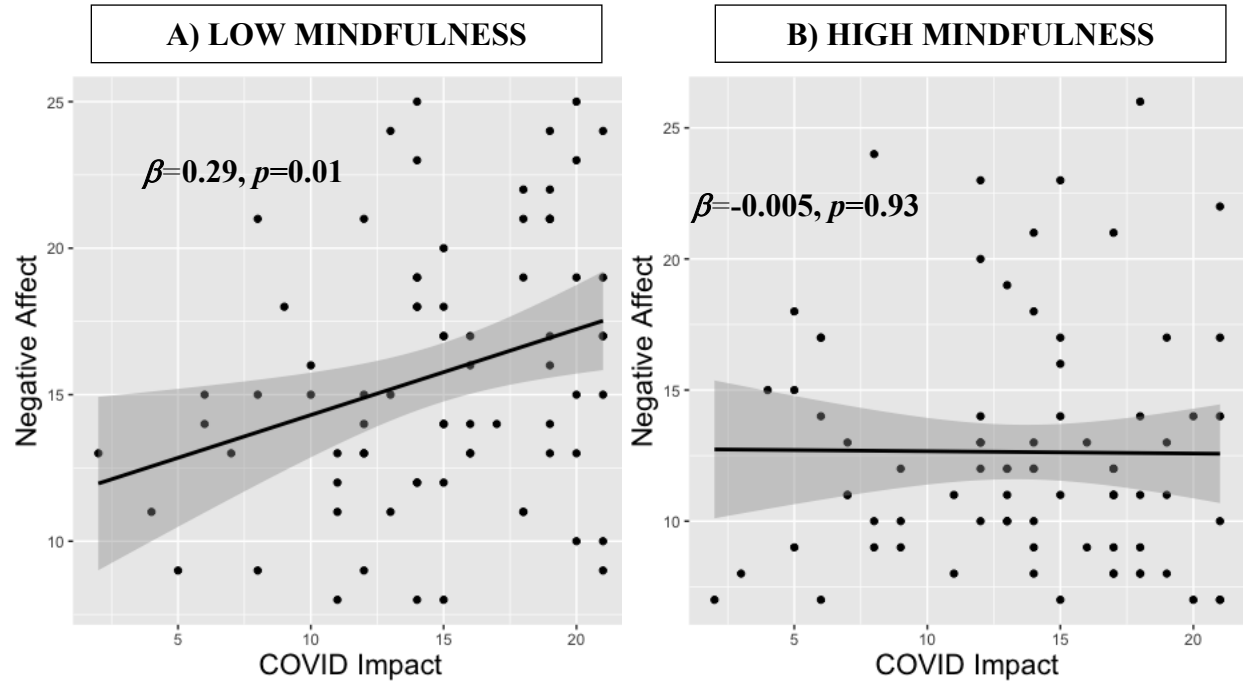

521

522 A) Low mindfulness children show positive correlation between COVID Impact and Negative

523 Affect. B) High mindfulness children show no relationship between COVID Impact and Negative

524 Affect. In black are linear regression fits with gray confidence bar, and regression slope and  $p$ -

525 values are listed in bold.

526



## MINDFULNESS SUPPORTS EMOTIONAL RESILIENCE

### 527 **Declarations**

#### 528 **Compliance with Ethical Standards**

529 This project received Institutional Review Board approval at the Massachusetts Institute of  
530 Technology (MIT).

531

#### 532 **Consent**

533 We obtained informed consent from the parents of all participants as well as assent from the  
534 children before they participated in the study.

535

#### 536 **Conflicts Of Interest**

537 The authors have no relevant financial or non-financial interests to disclose.

538

#### 539 **Funding Statement**

540 This research was funded by the Chan Zuckerberg Initiative as part of the Reach Every Reader  
541 Project, National Institutes of Health (F32-HD100064 to OO), and the National Science  
542 Foundation Graduate Research Fellowship (Grant No. 1745302 to HO).

543

#### 544 **Data, Materials and Code Availability**

545 Data and code will be made publicly available on publication at <https://osf.io/48bk3/>.

546

#### 547 **Author Contribution**

548 All authors contributed to the study conception and design. Material preparation, data collection  
549 and analysis were performed by INT, CEL, HAO, OO. The first draft of the manuscript was

## MINDFULNESS SUPPORTS EMOTIONAL RESILIENCE

550 written by INT and all authors commented on previous versions of the manuscript. All authors  
551 read and approved the final manuscript.

552

### 553 **Acknowledgements**

554 We thank our testers: Amanda Miller, David Bates, Ross Weissman, Joohee Baik, June Okada,  
555 William Oliver, and Harriet Richards. We also thank Xochitl Arechiga, Yesi Camacho Torres,  
556 Hope Kentala, Natalie Gardino, Jeff Dieffenbach, for helping to run the study, Yilei Chen for  
557 data preprocessing, and Sadie Zacharek for helpful comments on the manuscript. We thank the  
558 Hock E. Tan and K. Lisa Yang Center for Autism Research at Massachusetts Institute of  
559 Technology.

560
